# Supplementary material
Source: MDPI journal article supplement (https://www.mdpi.com/1424-2818/14/6/494)
Supplement: s1 [file s1]

**Table S6.** K2P distances of mtCOI sequences between genus *Nanomia* from Genbank and this study. Standard error estimates are shown above the diagonal with italics.

|                                      | 1     | 2            | 3            | 4            | 5            | 6            | 7            | 8            | 9            | 10           | 11           | 12           | 13           | 14           | 15           | 16           | 17           | 18           |
|--------------------------------------|-------|--------------|--------------|--------------|--------------|--------------|--------------|--------------|--------------|--------------|--------------|--------------|--------------|--------------|--------------|--------------|--------------|--------------|
| 1. <i>Nanomia bijuga</i>   ON532083* |       | <i>0.007</i> | <i>0.007</i> | <i>0.007</i> | <i>0.008</i> | <i>0.021</i> |
| 2. <i>Nanomia bijuga</i>   ON532084* | 0.023 |              | <i>0.000</i> | <i>0.000</i> | <i>0.008</i> | <i>0.021</i> | <i>0.021</i> | <i>0.021</i> | <i>0.021</i> | <i>0.021</i> | <i>0.020</i> | <i>0.020</i> | <i>0.021</i> | <i>0.020</i> | <i>0.020</i> | <i>0.020</i> | <i>0.021</i> | <i>0.020</i> |
| 3. <i>Nanomia bijuga</i>   ON532085* | 0.023 | 0.000        |              | <i>0.000</i> | <i>0.008</i> | <i>0.021</i> | <i>0.021</i> | <i>0.021</i> | <i>0.021</i> | <i>0.021</i> | <i>0.020</i> | <i>0.020</i> | <i>0.021</i> | <i>0.020</i> | <i>0.020</i> | <i>0.020</i> | <i>0.021</i> | <i>0.020</i> |
| 4. <i>Nanomia bijuga</i>   ON532086* | 0.023 | 0.000        | 0.000        |              | <i>0.008</i> | <i>0.021</i> | <i>0.021</i> | <i>0.021</i> | <i>0.021</i> | <i>0.021</i> | <i>0.020</i> | <i>0.020</i> | <i>0.021</i> | <i>0.020</i> | <i>0.020</i> | <i>0.020</i> | <i>0.021</i> | <i>0.020</i> |
| 5. <i>Nanomia bijuga</i>   AY937373  | 0.033 | 0.029        | 0.029        | 0.029        |              | <i>0.021</i> | <i>0.021</i> | <i>0.021</i> | <i>0.021</i> | <i>0.021</i> | <i>0.021</i> | <i>0.020</i> | <i>0.021</i> | <i>0.021</i> | <i>0.021</i> | <i>0.021</i> | <i>0.021</i> | <i>0.021</i> |
| 6. <i>Nanomia bijuga</i>   JQ716068  | 0.193 | 0.188        | 0.188        | 0.188        | 0.191        |              | <i>0.000</i> | <i>0.000</i> | <i>0.000</i> | <i>0.000</i> | <i>0.018</i> | <i>0.020</i> |
| 7. <i>Nanomia bijuga</i>   JQ716069  | 0.193 | 0.188        | 0.188        | 0.188        | 0.191        | 0.000        |              | <i>0.000</i> | <i>0.000</i> | <i>0.000</i> | <i>0.018</i> | <i>0.020</i> |
| 8. <i>Nanomia bijuga</i>   JQ71607   | 0.193 | 0.188        | 0.188        | 0.188        | 0.191        | 0.000        | 0.000        |              | <i>0.000</i> | <i>0.000</i> | <i>0.018</i> | <i>0.020</i> |
| 9. <i>Nanomia bijuga</i>   JQ716070  | 0.193 | 0.188        | 0.188        | 0.188        | 0.191        | 0.000        | 0.000        | 0.000        |              | <i>0.000</i> | <i>0.018</i> | <i>0.020</i> |
| 10. <i>Nanomia bijuga</i>   KF977305 | 0.193 | 0.188        | 0.188        | 0.188        | 0.191        | 0.000        | 0.000        | 0.000        | 0.000        |              | <i>0.018</i> | <i>0.020</i> |
| 11. <i>Nanomia bijuga</i>   LN901200 | 0.177 | 0.167        | 0.167        | 0.167        | 0.177        | 0.151        | 0.151        | 0.151        | 0.151        | 0.151        |              | <i>0.020</i> |
| 12. <i>Nanomia cara</i>   GQ120023   | 0.186 | 0.176        | 0.176        | 0.176        | 0.181        | 0.171        | 0.171        | 0.171        | 0.171        | 0.171        | 0.169        |              | <i>0.003</i> | <i>0.002</i> | <i>0.003</i> | <i>0.002</i> | <i>0.003</i> | <i>0.003</i> |
| 13. <i>Nanomia cara</i>   GQ120024   | 0.191 | 0.181        | 0.181        | 0.181        | 0.186        | 0.171        | 0.171        | 0.171        | 0.171        | 0.171        | 0.174        | 0.004        |              | <i>0.002</i> | <i>0.003</i> | <i>0.002</i> | <i>0.003</i> | <i>0.003</i> |
| 14. <i>Nanomia cara</i>   GQ120025   | 0.189 | 0.179        | 0.179        | 0.179        | 0.184        | 0.169        | 0.169        | 0.169        | 0.169        | 0.169        | 0.172        | 0.002        | 0.002        |              | <i>0.002</i> | <i>0.000</i> | <i>0.003</i> | <i>0.002</i> |
| 15. <i>Nanomia cara</i>   GQ120026   | 0.186 | 0.176        | 0.176        | 0.176        | 0.181        | 0.171        | 0.171        | 0.171        | 0.171        | 0.171        | 0.169        | 0.004        | 0.004        | 0.002        |              | <i>0.002</i> | <i>0.003</i> | <i>0.003</i> |
| 16. <i>Nanomia cara</i>   GQ120027   | 0.189 | 0.179        | 0.179        | 0.179        | 0.184        | 0.169        | 0.169        | 0.169        | 0.169        | 0.169        | 0.172        | 0.002        | 0.002        | 0.000        | 0.002        |              | <i>0.003</i> | <i>0.002</i> |
| 17. <i>Nanomia cara</i>   GQ120028   | 0.191 | 0.181        | 0.181        | 0.181        | 0.186        | 0.167        | 0.167        | 0.167        | 0.167        | 0.167        | 0.177        | 0.006        | 0.006        | 0.004        | 0.006        | 0.004        |              | <i>0.003</i> |
| 18. <i>Nanomia cara</i>   GQ120029   | 0.186 | 0.176        | 0.176        | 0.176        | 0.181        | 0.167        | 0.167        | 0.167        | 0.167        | 0.167        | 0.169        | 0.004        | 0.004        | 0.002        | 0.004        | 0.002        | 0.006        |              |

\*New acquired sequences.
