# Supplementary material
Source: MDPI journal article supplement (https://www.mdpi.com/1424-2818/14/6/494)
Supplement: s1 [file s1]

**Table S4.** K2P distances of mtCOI sequences between genus *Lensia* from Genbank and this study. Standard error estimates are shown above the diagonal with italics.

|                                            | 1     | 2            | 3            | 4            | 5            | 6            | 7            | 8            | 9            | 10           | 11           | 12           | 13           | 14           | 15           | 16           | 17           | 18           | 19           | 20           | 21           | 22           |
|--------------------------------------------|-------|--------------|--------------|--------------|--------------|--------------|--------------|--------------|--------------|--------------|--------------|--------------|--------------|--------------|--------------|--------------|--------------|--------------|--------------|--------------|--------------|--------------|
| 1. <i>Lensia subtiloides</i>   ON532017*   |       | <i>0.004</i> | <i>0.003</i> | <i>0.027</i> | <i>0.046</i> | <i>0.046</i> | <i>0.047</i> | <i>0.046</i> | <i>0.023</i> | <i>0.036</i> | <i>0.047</i> | <i>0.039</i> | <i>0.039</i> | <i>0.039</i> | <i>0.039</i> | <i>0.048</i> | <i>0.024</i> | <i>0.046</i> | <i>0.050</i> | <i>0.046</i> | <i>0.049</i> | <i>0.046</i> |
| 2. <i>Lensia subtiloides</i>   ON532018*   | 0.007 |              | <i>0.003</i> | <i>0.026</i> | <i>0.046</i> | <i>0.046</i> | <i>0.047</i> | <i>0.045</i> | <i>0.023</i> | <i>0.036</i> | <i>0.046</i> | <i>0.039</i> | <i>0.038</i> | <i>0.038</i> | <i>0.038</i> | <i>0.047</i> | <i>0.024</i> | <i>0.046</i> | <i>0.050</i> | <i>0.046</i> | <i>0.049</i> | <i>0.045</i> |
| 3. <i>Lensia subtiloides</i>   KF977289    | 0.005 | 0.005        |              | <i>0.030</i> | <i>0.049</i> | <i>0.049</i> | <i>0.049</i> | <i>0.048</i> | <i>0.025</i> | <i>0.041</i> | <i>0.050</i> | <i>0.045</i> | <i>0.044</i> | <i>0.044</i> | <i>0.044</i> | <i>0.052</i> | <i>0.027</i> | <i>0.055</i> | <i>0.057</i> | <i>0.048</i> | <i>0.056</i> | <i>0.049</i> |
| 4. <i>Lensia achilles</i>   GQ120000       | 0.272 | 0.267        | 0.269        |              | <i>0.044</i> | <i>0.044</i> | <i>0.044</i> | <i>0.042</i> | <i>0.022</i> | <i>0.031</i> | <i>0.042</i> | <i>0.034</i> | <i>0.034</i> | <i>0.034</i> | <i>0.034</i> | <i>0.043</i> | <i>0.024</i> | <i>0.045</i> | <i>0.049</i> | <i>0.042</i> | <i>0.049</i> | <i>0.043</i> |
| 5. <i>Lensia campanella</i>   GQ120001     | 0.572 | 0.568        | 0.511        | 0.539        |              | <i>0.007</i> | <i>0.007</i> | <i>0.008</i> | <i>0.039</i> | <i>0.045</i> | <i>0.051</i> | <i>0.043</i> | <i>0.043</i> | <i>0.043</i> | <i>0.043</i> | <i>0.053</i> | <i>0.040</i> | <i>0.051</i> | <i>0.046</i> | <i>0.047</i> | <i>0.046</i> | <i>0.049</i> |
| 6. <i>Lensia campanella</i>   GQ120066     | 0.576 | 0.573        | 0.521        | 0.538        | 0.028        |              | <i>0.008</i> | <i>0.007</i> | <i>0.040</i> | <i>0.046</i> | <i>0.049</i> | <i>0.043</i> | <i>0.043</i> | <i>0.043</i> | <i>0.043</i> | <i>0.053</i> | <i>0.040</i> | <i>0.051</i> | <i>0.049</i> | <i>0.046</i> | <i>0.049</i> | <i>0.048</i> |
| 7. <i>Lensia campanella</i>   JQ353738     | 0.584 | 0.581        | 0.521        | 0.538        | 0.026        | 0.032        |              | <i>0.005</i> | <i>0.039</i> | <i>0.045</i> | <i>0.050</i> | <i>0.045</i> | <i>0.045</i> | <i>0.045</i> | <i>0.045</i> | <i>0.054</i> | <i>0.040</i> | <i>0.050</i> | <i>0.048</i> | <i>0.045</i> | <i>0.048</i> | <i>0.047</i> |
| 8. <i>Lensia campanella</i>   JQ353739     | 0.568 | 0.564        | 0.506        | 0.518        | 0.030        | 0.028        | 0.011        |              | <i>0.039</i> | <i>0.045</i> | <i>0.049</i> | <i>0.045</i> | <i>0.044</i> | <i>0.044</i> | <i>0.044</i> | <i>0.053</i> | <i>0.039</i> | <i>0.050</i> | <i>0.048</i> | <i>0.045</i> | <i>0.048</i> | <i>0.046</i> |
| 9. <i>Lensia conoidea</i>   GQ120002       | 0.234 | 0.229        | 0.207        | 0.207        | 0.472        | 0.490        | 0.475        | 0.468        |              | <i>0.032</i> | <i>0.039</i> | <i>0.034</i> | <i>0.033</i> | <i>0.033</i> | <i>0.033</i> | <i>0.041</i> | <i>0.019</i> | <i>0.042</i> | <i>0.046</i> | <i>0.039</i> | <i>0.045</i> | <i>0.038</i> |
| 10. <i>Lensia cossack</i>   MZ292889       | 0.404 | 0.404        | 0.415        | 0.341        | 0.563        | 0.579        | 0.567        | 0.567        | 0.364        |              | <i>0.043</i> | <i>0.029</i> | <i>0.029</i> | <i>0.029</i> | <i>0.029</i> | <i>0.042</i> | <i>0.031</i> | <i>0.044</i> | <i>0.049</i> | <i>0.039</i> | <i>0.048</i> | <i>0.038</i> |
| 11. <i>Lensia exeter</i>   GQ120003        | 0.604 | 0.591        | 0.559        | 0.535        | 0.633        | 0.624        | 0.624        | 0.616        | 0.492        | 0.539        |              | <i>0.044</i> | <i>0.044</i> | <i>0.044</i> | <i>0.044</i> | <i>0.024</i> | <i>0.042</i> | <i>0.041</i> | <i>0.053</i> | <i>0.047</i> | <i>0.053</i> | <i>0.046</i> |
| 12. <i>Lensia fowleri</i>   GQ120004       | 0.454 | 0.451        | 0.456        | 0.367        | 0.518        | 0.513        | 0.544        | 0.537        | 0.385        | 0.312        | 0.543        |              | <i>0.003</i> | <i>0.003</i> | <i>0.003</i> | <i>0.044</i> | <i>0.037</i> | <i>0.043</i> | <i>0.043</i> | <i>0.039</i> | <i>0.042</i> | <i>0.039</i> |
| 13. <i>Lensia fowleri</i>   GQ120005       | 0.451 | 0.448        | 0.452        | 0.370        | 0.521        | 0.514        | 0.540        | 0.533        | 0.382        | 0.315        | 0.540        | 0.006        |              | <i>0.002</i> | <i>0.003</i> | <i>0.044</i> | <i>0.037</i> | <i>0.044</i> | <i>0.043</i> | <i>0.039</i> | <i>0.042</i> | <i>0.039</i> |
| 14. <i>Lensia fowleri</i>   GQ120006       | 0.451 | 0.448        | 0.452        | 0.370        | 0.518        | 0.510        | 0.537        | 0.529        | 0.382        | 0.312        | 0.539        | 0.004        | 0.002        |              | <i>0.002</i> | <i>0.044</i> | <i>0.037</i> | <i>0.044</i> | <i>0.042</i> | <i>0.039</i> | <i>0.042</i> | <i>0.039</i> |
| 15. <i>Lensia fowleri</i>   GQ120007       | 0.451 | 0.448        | 0.452        | 0.370        | 0.521        | 0.514        | 0.541        | 0.533        | 0.385        | 0.315        | 0.536        | 0.006        | 0.004        | 0.002        |              | <i>0.044</i> | <i>0.037</i> | <i>0.043</i> | <i>0.042</i> | <i>0.039</i> | <i>0.041</i> | <i>0.039</i> |
| 16. <i>Lensia grimaldii</i>   GQ120008     | 0.613 | 0.603        | 0.569        | 0.517        | 0.681        | 0.685        | 0.690        | 0.676        | 0.499        | 0.517        | 0.253        | 0.543        | 0.547        | 0.543        | 0.543        |              | <i>0.041</i> | <i>0.039</i> | <i>0.050</i> | <i>0.044</i> | <i>0.051</i> | <i>0.044</i> |
| 17. <i>Lensia hotspur</i>   GQ120009       | 0.246 | 0.248        | 0.241        | 0.225        | 0.503        | 0.515        | 0.511        | 0.492        | 0.156        | 0.349        | 0.524        | 0.427        | 0.423        | 0.423        | 0.427        | 0.506        |              | <i>0.041</i> | <i>0.045</i> | <i>0.040</i> | <i>0.045</i> | <i>0.040</i> |
| 18. <i>Lensia meteori</i>   GQ120010       | 0.583 | 0.579        | 0.585        | 0.543        | 0.651        | 0.660        | 0.638        | 0.642        | 0.510        | 0.540        | 0.489        | 0.543        | 0.547        | 0.543        | 0.540        | 0.481        | 0.499        |              | <i>0.051</i> | <i>0.051</i> | <i>0.051</i> | <i>0.050</i> |
| 19. <i>Lensia multicristata</i>   GQ120011 | 0.563 | 0.567        | 0.550        | 0.551        | 0.572        | 0.594        | 0.594        | 0.598        | 0.516        | 0.602        | 0.641        | 0.532        | 0.532        | 0.529        | 0.525        | 0.610        | 0.527        | 0.645        |              | <i>0.032</i> | <i>0.005</i> | <i>0.031</i> |
| 20. <i>Lensia multicristata</i>   GQ120012 | 0.527 | 0.523        | 0.486        | 0.501        | 0.560        | 0.546        | 0.539        | 0.526        | 0.459        | 0.465        | 0.566        | 0.458        | 0.458        | 0.458        | 0.458        | 0.555        | 0.461        | 0.627        | 0.355        |              | <i>0.032</i> | <i>0.004</i> |
| 21. <i>Lensia multicristata</i>   GQ120013 | 0.554 | 0.558        | 0.544        | 0.546        | 0.575        | 0.593        | 0.594        | 0.598        | 0.511        | 0.589        | 0.647        | 0.524        | 0.524        | 0.520        | 0.516        | 0.614        | 0.523        | 0.645        | 0.011        | 0.349        |              | <i>0.031</i> |
| 22. <i>Lensia multicristata</i>   GQ120014 | 0.523 | 0.519        | 0.491        | 0.505        | 0.577        | 0.563        | 0.555        | 0.542        | 0.456        | 0.465        | 0.558        | 0.465        | 0.465        | 0.465        | 0.465        | 0.547        | 0.457        | 0.618        | 0.348        | 0.007        | 0.342        |              |

\*New acquired sequences.
