# Supplementary material
Source: MDPI journal article supplement (https://www.mdpi.com/1424-2818/14/6/494)
Supplement: s1 [file s1]

**Table S5.** K2P distances of mtCOI sequences between genus *Muggiaea* from Genbank and this study. Standard error estimates are shown above the diagonal with italics.

[illegible]

\*New acquired sequences.
