# Supplementary material
Source: MDPI journal article supplement (https://www.mdpi.com/1424-2818/14/6/494)
Supplement: s1 [file s1]

**Table S2.** K2P distances of mtCOI sequences between genus *Ceratocymba* from Genbank and this study. Standard error estimates are shown above the diagonal with italics.

|                                              | 1     | 2            |
|----------------------------------------------|-------|--------------|
| 1. <i>Ceratocymba leuckartii</i>   ON553405* |       | <i>0.016</i> |
| 2. <i>Ceratocymba sagittata</i>   GQ119961   | 0.104 |              |

\*New acquired sequences.
