# Supplementary material
Source: MDPI journal article supplement (https://www.mdpi.com/1424-2818/14/6/494)
Supplement: s1 [file s1]

**Table S1.** DNA sequences used in the phylogenetic analyses of this study. N: Number of sequences.

| Suborder     | Family            | Species                           | N  | Accession Number                                                                      |
|--------------|-------------------|-----------------------------------|----|---------------------------------------------------------------------------------------|
| Calycophorae | Abylidae          | <i>Abylopsis eschscholtzii</i>    | 16 | GQ119937, KX384609, MH444747-MH444758, MW125242, MW125247                             |
|              |                   | <i>Abylopsis tetragona</i>        | 4  | GQ119938-GQ119939, HM053518, MW125218                                                 |
|              |                   | <i>Bassia bassensis</i>           | 4  | GQ119959-GQ119960, MW125215, MW125229                                                 |
|              |                   | <i>Ceratocymba leuckartii</i>     | 1  | ON553405*                                                                             |
|              |                   | <i>Ceratocymba sagittata</i>      | 1  | GQ119961                                                                              |
|              |                   | <i>Enneagonum hyalinum</i>        | 4  | GQ119974-GQ119975, MW125228, MW125239                                                 |
|              | Diphyidae         | <i>Chelophyes appendiculata</i>   | 7  | MW125230, MW125232-MW125233, MW125237, MW125240, MW125248, MZ292871                   |
|              |                   | <i>Chelophyes contorta</i>        | 3  | MZ292872-MZ292874                                                                     |
|              |                   | <i>Dimophyes arctica</i>          | 3  | ON539931*, GQ119966, MZ292875                                                         |
|              |                   | <i>Diphyes bojani</i>             | 6  | GQ119967-GQ119970, MZ292030-MZ292031                                                  |
|              |                   | <i>Diphyes chamissonis</i>        | 17 | KF962109-KF962110, KF977265-KF977271, MH388299, MH401084-MH401085, MZ292876-MZ292880  |
|              |                   | <i>Diphyes dispar</i>             | 11 | AY937367, GQ119971-GQ119973, KU529462, MH401081-MH401083, MZ292881-MZ292883           |
|              |                   | <i>Eudoxoides mitra</i>           | 12 | GQ119977-GQ119980, MH401079-MH401080, MW125217, MW125231, MW125236, MZ292884-MZ292886 |
|              |                   | <i>Eudoxoides spiralis</i>        | 6  | GQ119981-GQ119983, MW125238, MZ292887-MZ292888                                        |
|              |                   | <i>Lensia achilles</i>            | 1  | GQ120000                                                                              |
|              |                   | <i>Lensia campanella</i>          | 4  | GQ120001, GQ120066, JQ353738-JQ353739                                                 |
|              |                   | <i>Lensia conoidea</i>            | 1  | GQ120002                                                                              |
|              |                   | <i>Lensia cossack</i>             | 1  | MZ292889                                                                              |
|              |                   | <i>Lensia exeter</i>              | 1  | GQ120003                                                                              |
|              |                   | <i>Lensia fowleri</i>             | 4  | GQ120004-GQ120007                                                                     |
|              |                   | <i>Lensia grimaldii</i>           | 1  | GQ120008                                                                              |
|              |                   | <i>Lensia hotspur</i>             | 1  | GQ120009                                                                              |
|              |                   | <i>Lensia meteori</i>             | 1  | GQ120010                                                                              |
|              |                   | <i>Lensia multicristata</i>       | 4  | GQ120011-GQ120014                                                                     |
|              |                   | <i>Lensia subtiloides</i>         | 3  | ON532017 - ON532018*, KF977289                                                        |
|              |                   | <i>Muggiaea atlantica</i>         | 24 | ON540133 - ON540143*, JQ353740-JQ353745, KF977296-KF977299, MZ292890-MZ292892         |
|              |                   | <i>Sulculeolaria quadrivalvis</i> | 4  | AY937378, GQ120048-GQ120050                                                           |
|              | Clausophyidae**   | <i>Kephyes ovata</i>              | 1  | GQ119999                                                                              |
| Physonectae  | Agalmatidae       | <i>Agalma elegans</i>             | 6  | AY937363, GQ119940-GQ119943, KF962059                                                 |
|              |                   | <i>Agalma okenii</i>              | 14 | GQ119944-GQ119948, MH708467-MH708471, MW125221-MW125223, MW125246                     |
|              |                   | <i>Athorybia rosacea</i>          | 4  | AY937364, GQ119956, MW125219-MW125220                                                 |
|              |                   | <i>Frillagalma vityazi</i>        | 2  | GQ119986-GQ119987                                                                     |
|              |                   | <i>Halistemma cupulifera</i>      | 2  | GQ119989-GQ119991                                                                     |
|              |                   | <i>Halistemma isabu</i>           | 6  | MT933178-MT933183                                                                     |
|              |                   | <i>Halistemma rubrum</i>          | 1  | AY937372                                                                              |
|              |                   | <i>Marrus claudanielis</i>        | 1  | GQ120021                                                                              |
|              |                   | <i>Marrus orthocanna</i>          | 1  | GQ120019                                                                              |
|              |                   | <i>Nanomia bijuga</i>             | 11 | ON532083 - ON532086*, AY937373, JQ716068-JQ716071, KF977305, LN901200                 |
|              |                   | <i>Nanomia cara</i>               | 7  | GQ120023-GQ120029                                                                     |
|              | Cordagalmatidae** | <i>Cordagalma cordiforme</i>      | 1  | AY937366                                                                              |

\*New acquired sequences; \*\*: Outgroup.
