# Supplementary material
Source: MDPI journal article supplement (https://www.mdpi.com/1424-2818/14/6/494)
Supplement: s1 [file s1]

**Table S3.** K2P distances of mtCOI sequences between genus *Dimophyes* from Genbank and this study. Standard error estimates are shown above the diagonal with italics.

|                                         | 1     | 2            | 3            |
|-----------------------------------------|-------|--------------|--------------|
| 1. <i>Dimophyes arctica</i>   ON539931* |       | <i>0.027</i> | <i>0.004</i> |
| 2. <i>Dimophyes arctica</i>   GQ119966  | 0.342 |              | <i>0.028</i> |
| 3. <i>Dimophyes arctica</i>   MZ292875  | 0.013 | 0.363        |              |

\*New acquired sequences.
